# Supplementary material for: Genotypic richness predicts phenotypic variation in an endangered clonal plant
Source: PeerJ. 2016 Feb 18;4:e1633. doi: 10.7717/peerj.1633 (PMC4768672; doi:10.7717/peerj.1633)
Supplement: Data S1 — This file contains raw data for all plant traits measured, as well as shoot density, herbivorous fish, genotypic richness and allelic richness. [file peerj-04-1633-s006.xlsx]

## Sheet: Traits (individual shoots)
meadow	MLGs	sample	length	width	herbivory	area	epiphytes	biomass	productivity	nitrogen	phenols	Latitude	Longitude
WL	2	WL1	1195	36	13.5	10741.5	0.122	0.61	1220	0.791	2.91289	-32.247	152.469
WL	2	WL2	1330	27	37.5	11932.5	0.182	0.67	1786.67	1.054	1.49974	-32.247	152.469
WL	2	WL3	885	16	0	7080	0.07	0.43	1612.5	0.933	3.61368	-32.247	152.469
WL	2	WL4	1560	33	0	12915	0.293	0.73	1460	0.967	2.80579	-32.247	152.469
WL	2	WL5	850	26	4.5	7610.5	0.117	0.61	1626.67	1.021	3.125	-32.2471	152.469
WL	2	WL6	1155	24	6	9234	0.069	0.38	1013.33	0.864	4.21474	-32.2471	152.469
WL	2	WL7	890	27	0	8010	0.042	0.61	1423.33	0.74	2.43263	-32.2471	152.469
WL	2	WL8	1625	38	133.5	15546.5	0.183	0.88	1980	1.244	3.39974	-32.2471	152.469
WL	2	WL9	1215	27	0	10935	0.083	0.57	1520	0.633	2.06237	-32.247	152.469
WL	2	WL10	1260	32	13.5	10161.5	0.163	0.57	1140	0.823	2.93	-32.247	152.469
WL	2	WL11	420	17	0	3720	0.009	0.2	*	1.012	3.46658	-32.2471	152.469
WL	2	WL12	1060	21	0	7420	0.048	0.43	*	1.121	2.15658	-32.2471	152.469
WL	2	WL13	1020	35	0	9115	0.035	0.49	*	1.433	3.56895	-32.2471	152.469
WL	2	WL14	1295	28	1.5	11933.5	0.101	0.66	*	0.838	1.34263	-32.2471	152.469
WL	2	WL15	1355	38	0	13075	0.086	0.69	*	1.368	3.01658	-32.2472	152.469
WL	2	WL16	1210	26	15	10780	0.069	0.57	*	0.93	1.84605	-32.2472	152.469
WL	2	WL17	1045	35	9	9331	0.037	0.54	*	1.464	4.53316	-32.2472	152.469
WL	2	WL18	1180	35	0	10580	0.045	0.61	*	1.187	3.51342	-32.2472	152.469
WL	2	WL19	1230	32	0	9840	0.022	0.51	*	1.378	1.54974	-32.2472	152.469
WL	2	WL20	1170	29	0	11550	0.062	0.63	*	1.052	2.29211	-32.2472	152.469
WL	2	WL21	1130	24	9	9031	0.049	0.54	*	0.966	0.900789	-32.2472	152.469
WL	2	WL22	930	18	0	8370	0.05	0.48	*	1.027	3.42763	-32.2472	152.469
WL	2	WL23	1260	30	7.5	12592.5	0.064	0.63	*	1.162	3.28842	-32.2471	152.469
WL	2	WL24	1050	34	0	9350	0.081	0.54	*	2.065	2.33921	-32.2471	152.469
WL	2	WL25	1500	34	0	12940	0.124	0.72	*	0.878	4.61868	-32.2471	152.469
WL	2	WL26	830	24	0	6640	0.035	0.33	*	0.714	2.59395	-32.2471	152.469
WL	2	WL27	1700	39	0	16580	0.198	0.94	*	1.038	1.82605	-32.2471	152.469
WL	2	WL28	680	26	25.5	6064.5	0.093	0.36	*	0.923	2.91947	-32.2471	152.469
WL	2	WL29	600	18	0	5400	0.062	0.31	*	1.446	3.72421	-32.2471	152.469
WL	2	WL30	1060	30	46.5	10553.5	0.077	0.53	*	0.714	3.13789	-32.2472	152.468
PS	5	PS1	690	35	4.5	8210.5	0.372	0.52	1126.67	1.501	3.13421	-32.7188	152.076
PS	5	PS2	815	24	0	9780	0.439	0.68	2720	1.395	3.30053	-32.7187	152.076
PS	5	PS3	515	24	15	6165	0.174	0.4	1534	1.722	3.58079	-32.7187	152.076
PS	5	PS4	990	35	118.5	11411.5	0.366	0.56	*	1.385	3.52053	-32.7186	152.076
PS	5	PS5	1005	35	6	11914	0.796	0.81	1890	1.153	2.75237	-32.7186	152.076
PS	5	PS6	630	24	10.5	7549.5	0.24	0.51	2124.15	1.384	4.865	-32.7193	152.077
PS	5	PS7	705	28	85.5	6669.5	0.332	0.48	1440	1.148	1.75789	-32.7185	152.076
PS	5	PS8	660	45	0	7805	0.319	0.58	1160	1.124	3.01579	-32.7185	152.076
PS	5	PS9	760	47	10.5	9089.5	0.459	0.63	1260	1.236	2.43342	-32.7185	152.076
PS	5	PS10	630	22	0	6930	0.446	0.47	1880	1.211	3.43237	-32.7184	152.076
PS	5	PS11	850	46	133.5	9746.5	0.214	0.68	1360	1.121	3.80605	-32.7184	152.076
PS	5	PS12	895	35	31.5	10688.5	0.572	0.73	*	1.196	3.28711	-32.7183	152.076
PS	5	PS13	675	20	69	6681	0.32	0.45	*	0.772	3.34158	-32.7183	152.076
PS	5	PS14	710	30	21	7079	0.261	0.52	*	1.035	3.83316	-32.7183	152.076
PS	5	PS15	460	20	28.5	4571.5	0.181	0.32	*	1.303	4.04237	-32.7183	152.076
PS	5	PS16	525	21	22.5	5592.5	0.148	0.39	*	1.136	4.67684	-32.7183	152.076
PS	5	PS17	540	18	46.5	4813.5	0.176	0.4	*	0.991	4.27105	-32.7182	152.076
PS	5	PS18	595	21	0	6390	0.13	0.41	*	1.277	3.54553	-32.7182	152.076
PS	5	PS19	750	23	39	8591	0.246	0.56	*	1.339	3.80342	-32.7182	152.076
PS	5	PS20	815	18	9	7326	0.454	0.48	*	1.305	3.38184	-32.7182	152.076
PS	5	PS21	780	33	84	8496	0.532	0.56	*	1.175	2.35184	-32.7181	152.076
PS	5	PS22	700	23	0	8095	0.579	0.54	*	*	*	-32.7181	152.076
PS	5	PS23	525	27	18	4707	0.036	0.21	*	0.785	4.22711	-32.7181	152.076
PS	5	PS24	620	20	4.5	6195.5	0.315	0.42	*	0.777	4.19	-32.7181	152.076
PS	5	PS25	750	35	19.5	8915.5	0.299	0.59	*	1.182	3.25105	-32.718	152.076
PS	5	PS26	605	24	6	7254	0.255	0.52	*	1.323	4.07684	-32.718	152.076
PS	5	PS27	855	35	0	9905	0.267	0.62	*	1.343	1.40289	-32.7179	152.076
PS	5	PS28	830	20	31.5	8268.5	0.226	0.6	*	1.481	3.81263	-32.7179	152.076
PS	5	PS29	760	27	30	6810	0.254	0.44	*	1.341	1.93368	-32.7179	152.076
PS	5	PS30	710	36	16.5	8503.5	0.249	0.52	*	1.449	3.99105	-32.7178	152.076
LM	3	LM1	980	29	0	9690	0.061	0.68	1700	0.865	2.15158	-33.0499	151.647
LM	3	LM2	895	28	0	8445	0.103	0.54	1260	0.717	1.95816	-33.0499	151.647
LM	3	LM3	300	14	0	2100	0.017	0.13	455	0.673	2.85816	-33.0499	151.647
LM	3	LM4	940	29	1.5	9138.5	0.138	0.59	1278.33	0.723	1.02526	-33.0499	151.647
LM	3	LM5	635	21	0	4445	0.014	0.31	723.333	0.88	1.92053	-33.0499	151.647
LM	3	LM6	880	30	0	8800	0.03	0.56	1306.67	0.827	2.63921	-33.0498	151.647
LM	3	LM7	785	28	0	7435	0.048	0.47	1096.67	0.763	2.12711	-33.0498	151.647
LM	3	LM8	560	19	4.5	5265.5	0.015	0.36	1560.6	0.86	3.54974	-33.0498	151.647
LM	3	LM9	615	19	0	5920	0.039	0.36	1260	0.723	3.25842	-33.0499	151.647
LM	3	LM10	815	26	0	7260	0.027	0.51	1275	0.492	1.99632	-33.0499	151.647
LM	3	LM11	1025	30	1.5	10248.5	0.067	0.67	*	0.604	1.24237	-33.0499	151.647
LM	3	LM12	870	29	1.5	8558.5	0.02	0.51	*	0.752	1.23447	-33.05	151.647
LM	3	LM13	730	27	0	6570	0.02	0.44	*	0.648	1.22395	-33.05	151.647
LM	3	LM14	890	36	0	8105	0.031	0.49	*	0.889	3.30342	-33.0501	151.647
LM	3	LM15	925	30	0	9250	0.029	0.62	*	0.993	2.99184	-33.0497	151.647
LM	3	LM16	630	25	10.5	5324.5	0.018	0.34	*	0.69	2.43526	-33.0497	151.647
LM	3	LM17	900	25	0	7520	0.017	0.52	*	0.69	2.06079	-33.0497	151.647
LM	3	LM18	590	19	0	5660	0.022	0.34	*	0.8565	2.50079	-33.0497	151.647
LM	3	LM19	970	28	3	9207	0.014	0.59	*	0.719	2.32316	-33.0496	151.647
LM	3	LM20	840	28	0	7940	0.007	0.52	*	0.665	2.58237	-33.0496	151.647
LM	3	LM21	725	27	6	6519	0.005	0.46	*	0.665	2.57368	-33.0496	151.647
LM	3	LM22	520	18	3	4677	0.002	0.3	*	0.937	3.30816	-33.0496	151.647
LM	3	LM23	590	26	0	5270	0.011	0.29	*	0.609	2.83289	-33.0495	151.647
LM	3	LM24	570	16	0	4560	0.007	0.3	*	0.882	2.205	-33.0495	151.647
LM	3	LM25	455	18	0	4095	0.002	0.24	*	0.703	3.27026	-33.0494	151.647
LM	3	LM26	545	24	0	4360	0.016	0.28	*	0.965	1.86895	-33.0494	151.647
LM	3	LM27	885	27	0	7965	0.025	0.48	*	0.579	2.17211	-33.0494	151.647
LM	3	LM28	605	18	0	5445	0.012	0.32	*	0.965	2.17868	-33.0494	151.647
LM	3	LM29	620	18	1.5	5578.5	0.009	0.33	*	0.678	2.53711	-33.0494	151.647
LM	3	LM30	460	18	0	4140	0.017	0.25	*	0.801	2.52474	-33.0495	151.647
BW	4	BW1	684	30	0	6840	0.148	0.44	1173.33	1.09	1.17053	-33.4514	151.328
BW	4	BW2	688	36	0	6464	0.021	0.41	717.5	0.699	2.25184	-33.4514	151.328
BW	4	BW3	630	33	0	5275	0.063	0.3	525	0.408	4.22921	-33.4514	151.328
BW	4	BW4	760	27	15	7005	0.149	0.43	1003.33	0.853	3.89789	-33.4514	151.328
BW	4	BW5	965	38	0	8935	0.266	0.55	962.5	0.547	4.87658	-33.4514	151.328
BW	4	BW6	530	21	0	3710	0.125	0.27	630	0.694	3.37	-33.4514	151.328
BW	4	BW7	835	25	34.5	7170.5	0.178	0.37	*	0.882	2.31237	-33.4514	151.328
BW	4	BW8	725	25	0	6120	0.195	0.39	780	0.815	1.90789	-33.4514	151.328
BW	4	BW9	540	23	0	4315	0.065	0.27	720	0.964	1.69789	-33.4515	151.328
BW	4	BW10	590	29	3	5842	0.046	0.34	623.333	1.218	2.70474	-33.4515	151.328
BW	4	BW11	695	30	0	6950	0.089	0.48	1040	1.236	2.49842	-33.4515	151.328
BW	4	BW12	475	16	0	3800	0.019	0.28	*	1.04	2.87395	-33.4515	151.328
BW	4	BW13	430	17	0	3685	0.027	0.26	*	1.664	4.36474	-33.4515	151.328
BW	4	BW14	520	27	0	4680	0.019	0.27	*	0.793	3.44447	-33.4516	151.328
BW	4	BW15	830	28	0	7820	0.118	0.46	*	0.877	1.74974	-33.4516	151.328
BW	4	BW16	415	16	0	3320	0.021	0.2	*	0.677	3.615	-33.4516	151.328
BW	4	BW17	653	28	0	6424	0.039	0.31	*	0.928	3.84763	-33.4516	151.328
BW	4	BW18	575	18	0	5175	0.05	0.31	*	1.128	3.745	-33.4515	151.328
BW	4	BW19	945	31	4.5	9825.5	0.111	0.55	*	1.035	2.09974	-33.4515	151.328
BW	4	BW20	650	26	4.5	5780.5	0.061	0.2	*	0.916	3.71763	-33.4515	151.328
BW	4	BW21	605	28	0	6000	0.064	0.35	*	1.806	2.39553	-33.4515	151.328
BW	4	BW22	520	27	0	4680	0.027	0.26	*	0.747	3.18447	-33.4515	151.328
BW	4	BW23	760	27	0	6840	0.127	0.37	*	0.728	2.10868	-33.4515	151.328
BW	4	BW24	485	26	0	4325	0.033	0.25	*	0.697	5.10105	-33.4515	151.328
BW	4	BW25	785	30	3	7847	0.209	0.43	*	0.635	2.42026	-33.4514	151.328
BW	4	BW26	790	24	0	6320	0.289	0.39	*	0.606	2.62895	-33.4514	151.328
BW	4	BW27	595	24	0	4760	0.082	0.27	*	0.169	3.02316	-33.4514	151.328
BW	4	BW28	470	27	0	4670	0.067	0.28	*	1.015	3.16605	-33.4514	151.328
BW	4	BW29	705	30	0	7050	0.236	0.44	*	*	*	-33.4514	151.328
BW	4	BW30	555	27	0	4995	0.066	0.3	*	0.684	2.32658	-33.4514	151.327
PW	3	PW1	885	32	0	9695	0.325	0.65	1516.67	*	*	-33.592	151.32
PW	3	PW2	390	21	0	4240	0.083	0.23	920	1.084	2.32263	-33.592	151.32
PW	3	PW3	745	33	0	8195	0.405	0.453	906	1.684	2.99263	-33.592	151.32
PW	3	PW4	675	33	30	7395	0.377	0.46	1226.67	0.952	1.66605	-33.592	151.32
PW	3	PW5	445	32	0	4855	0.241	0.29	580	1.147	3.23658	-33.5921	151.32
PW	3	PW6	265	9	0	2385	0.169	0.125	1000	1.278	2.37105	-33.5921	151.32
PW	3	PW7	620	33	31.5	6788.5	0.253	0.43	1050.63	0.883	3.48079	-33.5921	151.32
PW	3	PW8	825	35	0	9845	0.338	0.585	*	1.432	3.93895	-33.5921	151.32
PW	3	PW9	770	26	61.5	9948.5	0.278	0.59	2065	1.325	3.61974	-33.5921	151.32
PW	3	PW10	515	32	0	5640	0.061	0.302	*	*	*	-33.5921	151.32
PW	3	PW11	710	36	0	8520	0.265	0.467	*	*	*	-33.5921	151.32
PW	3	PW12	720	32	3	7892	0.394	0.53	*	1.29276	3.22878	-33.5922	151.32
PW	3	PW13	880	38	213	11117	0.374	0.637	*	1.47	2.82711	-33.5922	151.32
PW	3	PW14	860	35	48	10232	0.436	0.628	*	1.228	2.70368	-33.5922	151.32
PW	3	PW15	685	36	0	8220	0.346	0.48	*	1.396	2.92026	-33.5922	151.32
PW	3	PW16	750	24	0	9000	0.321	0.518	*	1.418	2.22289	-33.5922	151.32
PW	3	PW17	900	37	0	11190	0.599	0.655	*	1.492	3.03263	-33.5923	151.32
PW	3	PW18	340	20	52.5	3347.5	0.036	0.186	*	1.416	2.73342	-33.5923	151.32
PW	3	PW19	675	23	0	7855	0.177	0.463	*	1.366	2.51526	-33.5923	151.32
PW	3	PW20	771	37	27	9984	0.355	0.55	*	1.432	2.75158	-33.5924	151.32
PW	3	PW21	650	24	6	7794	0.254	0.48	*	1.465	2.70605	-33.5924	151.32
PW	3	PW22	675	23	0	7920	0.148	0.42	*	2.188	3.83263	-33.5924	151.32
PW	3	PW23	560	25	0	7145	0.146	0.405	*	1.583	5.46632	-33.5924	151.32
PW	3	PW24	450	29	0	4490	0.054	0.204	*	1.338	2.54684	-33.5924	151.32
PW	3	PW25	695	24	0	8340	0.229	0.474	*	1.304	3.14947	-33.5925	151.32
PW	3	PW26	495	21	39	5221	0.181	0.305	*	1.485	3.69737	-33.5925	151.32
PW	3	PW27	775	24	34.5	9265.5	0.347	0.53	*	1.14	2.75658	-33.5925	151.32
PW	3	PW28	1040	40	0	14010	0.668	0.77	*	1.472	2.37053	-33.5926	151.32
PW	3	PW29	855	26	4.5	11110.5	0.291	*	*	1.572	2.44605	-33.5926	151.32
PW	3	PW30	760	26	15	9865	0.412	0.538	*	1.537	3.30868	-33.5926	151.32
SH	9	SH1	695	24	52.5	8287.5	0.468	0.46	1840	1.427	1.29263	-33.8039	151.271
SH	9	SH2	710	37	42	9178	0.335	0.55	1466.67	1.431	1.84526	-33.8038	151.271
SH	9	SH3	765	24	1.5	9178.5	0.336	0.52	1820	1.862	3.19289	-33.8038	151.271
SH	9	SH4	880	35	10.5	10099.5	0.164	0.38	886.667	1.217	0.37	-33.8037	151.271
SH	9	SH5	585	24	147	6873	0.193	0.32	1120	1.767	2.12684	-33.8037	151.271
SH	9	SH6	615	24	15	7365	0.239	0.45	1687.5	1.523	2.30237	-33.8037	151.271
SH	9	SH7	475	32	73.5	5096.5	0.341	0.23	460	1.289	0.852368	-33.8037	151.271
SH	9	SH8	585	23	42	6858	0.167	0.34	1530	1.653	3.74947	-33.8036	151.271
SH	9	SH9	730	22	34.5	7995.5	0.231	0.47	1645	1.45	2.56842	-33.8036	151.271
SH	9	SH10	770	28	27	10753	0.568	0.71	3195	1.683	1.79184	-33.8036	151.271
SH	9	SH11	730	26	0	9490	0.429	0.59	*	1.752	2.255	-33.8036	151.271
SH	9	SH12	575	27	28.5	5146.5	0.232	0.26	*	1.705	1.27579	-33.8035	151.271
SH	9	SH13	750	22	85.5	8164.5	0.549	0.46	*	1.639	2.275	-33.8035	151.27
SH	9	SH14	335	36	61.5	4203.5	0.086	0.16	*	1.49	1.90842	-33.8035	151.27
SH	9	SH15	885	38	123	11332	0.466	0.72	*	1.325	1.56316	-33.8035	151.27
SH	9	SH16	780	35	19.5	9275.5	0.352	0.57	*	1.824	1.24526	-33.8034	151.27
SH	9	SH17	575	24	0	6900	0.138	0.38	*	2.175	3.71237	-33.8034	151.27
SH	9	SH18	570	24	0	6840	0.237	0.46	*	2.195	3.51421	-33.8034	151.27
SH	9	SH19	420	21	0	4570	0.163	0.19	*	1.548	3.31	-33.8034	151.27
SH	9	SH20	960	39	108	12372	0.509	0.73	*	1.23	0.948158	-33.8041	151.271
SH	9	SH21	625	35	0	7435	0.163	0.34	*	1.404	1.59684	-33.8041	151.271
SH	9	SH22	695	24	153	8187	0.251	0.44	*	1.564	2.91553	-33.8042	151.271
SH	9	SH23	305	20	10.5	3039.5	0.074	0.19	*	1.768	3.50868	-33.8042	151.271
SH	9	SH24	375	18	31.5	3343.5	0.394	0.19	*	1.864	4.96053	-33.8042	151.271
SH	9	SH25	510	21	36	5374	0.201	0.3	*	2.042	1.98895	-33.8042	151.271
SH	9	SH26	410	22	58.5	4451.5	0.321	0.18	*	1.568	3.19	-33.8043	151.271
SH	9	SH27	500	23	94.5	5675.5	0.179	0.39	*	2.013	4.52763	-33.8043	151.271
SH	9	SH28	610	26	67.5	7862.5	0.406	0.45	*	1.485	1.55	-33.8043	151.271
SH	9	SH29	570	27	33	7807	0.097	0.44	*	1.692	3.00842	-33.8043	151.271
SH	9	SH30	500	36	108	6377	0.165	0.38	*	1.723	2.00474	-33.8043	151.271
BB	7	BB1	590	24	36	7044	0.243	0.43	1290	2.236	4.43921	-34.0064	151.189
BB	7	BB2	475	20	30	4720	0.224	0.29	1015	1.874	3.80026	-34.0064	151.189
BB	7	BB3	860	22	15	9445	0.494	0.59	2065	2.197	2.87421	-34.0064	151.189
BB	7	BB4	640	32	51	6969	0.308	0.44	1026.67	2.421	3.28658	-34.0064	151.189
BB	7	BB5	515	18	0	4635	0.231	0.32	1280	1.65	3.59447	-34.0064	151.189
BB	7	BB6	385	32	31.5	4143.5	0.088	0.21	490	2.014	3.17263	-34.0064	151.189
BB	7	BB7	745	21	54	7986	0.315	0.46	1840	2.1	3.72421	-34.0064	151.189
BB	7	BB8	580	23	60	6680	0.369	0.42	1785	2.179	4.19079	-34.0065	151.189
BB	7	BB9	620	30	67.5	6132.5	0.389	0.36	960	2.172	1.84158	-34.0065	151.189
BB	7	BB10	680	23	0	7890	0.678	*	*	1.694	2.96053	-34.0065	151.189
BB	7	BB11	1005	36	13.5	12046.5	0.809	0.73	*	1.998	2.36026	-34.0065	151.189
BB	7	BB12	670	30	39	6661	0.412	0.37	*	2.276	2.23474	-34.0065	151.189
BB	7	BB13	775	43	76.5	8358.5	0.445	0.5	*	1.736	5.16711	-34.0065	151.189
BB	7	BB14	450	22	9	4941	0.493	0.28	*	2.207	3.14158	-34.0065	151.189
BB	7	BB15	480	20	61.5	4738.5	0.295	0.31	*	2.508	2.77474	-34.0065	151.189
BB	7	BB16	935	34	48	10692	0.503	0.62	*	*	*	-34.0066	151.189
BB	7	BB17	705	30	0	7050	0.332	0.4	*	2.006	1.98237	-34.0066	151.188
BB	7	BB18	590	22	73.5	6416.5	0.305	0.4	*	2.093	3.45079	-34.0066	151.188
BB	7	BB19	1100	36	15	13185	0.652	0.83	*	2.371	2.05395	-34.0066	151.188
BB	7	BB20	580	20	0	5800	0.423	0.39	*	2.226	3.22421	-34.0066	151.188
BB	7	BB21	675	29	0	6715	0.322	0.42	*	2.113	2.61711	-34.0066	151.188
BB	7	BB22	620	18	0	5580	0.186	0.31	*	2.367	3.58316	-34.0067	151.188
BB	7	BB23	510	28	97.5	4962.5	0.147	0.32	*	*	*	-34.0067	151.188
BB	7	BB24	725	27	0	6525	0.418	0.35	*	2.487	1.82421	-34.0066	151.188
BB	7	BB25	720	38	51	6719	0.151	0.41	*	1.153	3.39605	-34.0066	151.188
BB	7	BB26	590	20	13.5	5886.5	0.26	0.42	*	2.162	2.75974	-34.0066	151.188
BB	7	BB27	650	22	0	7150	0.273	0.45	*	2.097	3.15842	-34.0066	151.188
BB	7	BB28	525	30	12	5238	0.263	0.32	*	2.227	2.12737	-34.0065	151.188
BB	7	BB29	815	30	64.5	8085.5	0.558	0.46	*	2.238	2.10263	-34.0065	151.188
BB	7	BB30	690	20	7.5	6892.5	0.651	0.48	*	2.325	2.08263	-34.0065	151.188
PH	5	PH1	605	27	135	5310	0.135	0.37	1110	1.106	2.26789	-34.0669	151.13
PH	5	PH2	720	33	37.5	7882.5	0.289	0.45	949.5	1.281	3.77053	-34.0669	151.13
PH	5	PH3	415	19	84	3896	0.439	0.23	862.5	1.552	2.63737	-34.0669	151.13
PH	5	PH4	615	33	27	6738	0.158	0.4	*	1.337	3.18053	-34.0669	151.13
PH	5	PH5	695	33	10.5	7634.5	0.079	0.41	888.333	1.23	2.15632	-34.067	151.13
PH	5	PH6	650	33	82.5	7067.5	0.692	0.43	860	1.686	2.76658	-34.067	151.13
PH	5	PH7	534	28	24	5308	0.154	0.28	746.667	1.361	3.11895	-34.067	151.13
PH	5	PH8	630	33	67.5	7117.5	0.138	0.36	720	1.167	2.26026	-34.0671	151.13
PH	5	PH9	935	33	10.5	10274.5	0.42	0.55	1283.33	*	*	-34.0671	151.13
PH	5	PH10	705	31	13.5	7356.5	0.074	0.42	910	1.243	2.81158	-34.0671	151.13
PH	5	PH11	725	30	45	7205	0.114	0.42	*	1.11	2.33026	-34.0671	151.13
PH	5	PH12	870	33	90	9480	0.288	0.52	*	1.164	3.01816	-34.0672	151.13
PH	5	PH13	895	33	33	9812	0.238	0.56	*	1.422	2.66079	-34.0672	151.13
PH	5	PH14	430	30	49.5	4360.5	0.086	0.24	*	1.18	3.40553	-34.0673	151.13
PH	5	PH15	780	30	34.5	7765.5	0.18	0.41	*	1.331	2.31026	-34.0672	151.13
PH	5	PH16	620	32	186	6559	0.018	0.39	*	1.189	2.56947	-34.0672	151.13
PH	5	PH17	505	20	0	5050	0.098	0.26	*	1.104	4.45816	-34.0672	151.13
PH	5	PH18	735	32	51	7969	0.297	0.43	*	1.128	2.80632	-34.0671	151.13
PH	5	PH19	465	20	4.5	4645.5	0.088	0.23	*	1.461	4.62947	-34.0671	151.13
PH	5	PH20	680	32	0	7455	0.378	0.47	*	1.534	4.03947	-34.0671	151.13
PH	5	PH21	930	34	43.5	10616.5	0.155	0.63	*	1.257	3.24	-34.067	151.13
PH	5	PH22	870	35	93	10242	0.372	0.66	*	1.271	3.13026	-34.067	151.13
PH	5	PH23	820	34	0	9155	0.176	0.43	*	1.036	4.05816	-34.067	151.13
PH	5	PH24	680	35	3	8107	0.179	0.44	*	1.077	3.30868	-34.0669	151.13
PH	5	PH25	725	31	0	7600	0.091	0.41	*	1.206	3.53737	-34.0669	151.13
PH	5	PH26	550	30	37.5	5462.5	0.256	0.36	*	1.119	3.605	-34.0669	151.13
PH	5	PH27	680	32	3	7377	0.224	0.43	*	1.406	2.73895	-34.0669	151.13
PH	5	PH28	585	29	0	5710	0.118	0.32	*	0.967	4.60184	-34.0668	151.13
PH	5	PH29	450	29	4.5	4460.5	0.006	0.25	*	1.186	4.17684	-34.0668	151.13
PH	5	PH30	570	30	0	5700	0.042	0.3	*	1.527	2.63684	-34.0668	151.13
JB	3	JB1	365	21	49.5	3895.5	0.163	0.22	715	2.31	3.04816	-35.0011	150.726
JB	3	JB2	565	24	4.5	6775.5	0.269	0.43	1720	2.209	3.73737	-35.0011	150.726
JB	3	JB3	740	24	72	8808	0.173	0.58	2030	2.105	2.91263	-35.0011	150.726
JB	3	JB4	460	24	19.5	5500.5	0.107	0.31	1085	1.427	2.54368	-35.0011	150.726
JB	3	JB5	420	19	15	4020	0.109	0.25	875	2.188	3.77395	-35.0011	150.726
JB	3	JB6	580	26	57	7483	0.174	0.45	2025	2.138	4.645	-35.0011	150.726
JB	3	JB7	485	22	19.5	5315.5	0.217	0.34	*	2.046	5.77421	-35.0011	150.726
JB	3	JB8	450	21	63	4797	0.153	0.35	1225	1.997	3.22605	-35.0011	150.726
JB	3	JB9	540	20	43.5	5356.5	0.194	0.37	1295	1.82	4.93474	-35.0011	150.726
JB	3	JB10	615	25	0	7790	0.208	0.49	1715	2.017	4.37632	-35.0011	150.726
JB	3	JB11	515	24	0	6180	0.097	0.39	*	1.78	4.97842	-35.0011	150.726
JB	3	JB12	860	38	0	10930	0.335	0.56	*	1.424	6.01184	-35.0011	150.726
JB	3	JB13	585	22	13.5	6421.5	0.103	0.42	*	1.219	6.80289	-35.0011	150.726
JB	3	JB14	600	24	70.5	7129.5	0.253	0.48	*	1.653	4.79658	-35.0011	150.726
JB	3	JB15	520	24	46.5	6193.5	0.304	0.4	*	1.6	4.62105	-35.0011	150.726
JB	3	JB16	600	24	37.5	7162.5	0.291	0.52	*	0.659	4.54158	-35.0011	150.726
JB	3	JB17	550	25	0	6990	0.238	0.44	*	1.657	5.14026	-35.0011	150.726
JB	3	JB18	610	24	13.5	7306.5	0.382	0.52	*	1.747	4.21026	-35.0011	150.726
JB	3	JB19	590	24	18	7062	0.358	0.43	*	1.713	3.76974	-35.0011	150.726
JB	3	JB20	665	24	27	7953	0.321	0.57	*	1.664	4.32684	-35.0011	150.726
JB	3	JB21	775	24	13.5	9286.5	0.177	0.58	*	1.193	4.63947	-35.0011	150.727
JB	3	JB22	685	26	0	8905	0.304	0.53	*	1.438	3.67263	-35.0011	150.727
JB	3	JB23	670	27	66	9044	0.259	0.53	*	1.37	4.52579	-35.0011	150.727
JB	3	JB24	490	25	0	6285	0.133	0.41	*	1.101	3.73842	-35.0011	150.727
JB	3	JB25	660	38	21	8509	0.543	0.55	*	1.581	4.62947	-35.0011	150.727
JB	3	JB26	540	22	22.5	5917.5	0.324	0.37	*	1.815	4.50789	-35.001	150.727
JB	3	JB27	590	24	34.5	7045.5	0.34	0.43	*	1.858	3.73684	-35.001	150.727
JB	3	JB28	520	20	78	5122	0.12	0.33	*	1.605	3.42816	-35.001	150.727
JB	3	JB29	775	24	27	9273	0.416	0.61	*	1.575	4.60684	-35.001	150.726
JB	3	JB30	505	24	63	5997	0.372	0.38	*	1.105	4.39632	-35.001	150.726
SG	21	SG1	1050	29	0	7615	0.001	0.51	*	*	*	-35.1174	150.661
SG	21	SG2	1300	23	0	9785	0.001	0.61	1626.67	1.566	1.72579	-35.1173	150.661
SG	21	SG3	385	17	0	2290	0.009	0.2	466.667	*	*	-35.1174	150.661
SG	21	SG4	305	13	0	2020	0.001	0.16	480	1.211	5.66868	-35.1174	150.661
SG	21	SG5	560	19	0	3620	0.005	0.28	653.333	1.12	2.22474	-35.1174	150.661
SG	21	SG6	1065	24	0	8520	0.017	0.56	1493.33	0.92	2.44868	-35.1174	150.661
SG	21	SG7	700	24	0	5600	0.026	0.35	816.667	1.064	2.49395	-35.1173	150.661
SG	21	SG8	580	22	0	4300	0.011	0.31	*	1.216	3.05711	-35.1173	150.661
SG	21	SG9	1395	21	0	9765	0.066	*	*	1.503	1.33211	-35.1173	150.661
SG	21	SG10	445	7	4.5	3110.5	0.006	0.39	1560	1.763	1.54947	-35.1173	150.661
SG	21	SG11	370	16	0	2960	0.008	0.48	*	1.173	4.02895	-35.1172	150.661
SG	21	SG12	865	22	0	6470	0.003	0.39	*	1.238	2.44737	-35.1172	150.661
SG	21	SG13	645	18	0	3870	0.376	0.34	*	1.394	2.82342	-35.1172	150.661
SG	21	SG14	960	24	0	7680	0.015	0.54	*	1.037	3.44316	-35.1171	150.661
SG	21	SG15	520	12	0	3120	0.018	0.26	*	1.394	4.50632	-35.1171	150.661
SG	21	SG16	1075	23	0	8590	0.024	0.58	*	1.245	2.39316	-35.1171	150.661
SG	21	SG17	880	14	0	6160	0.026	0.38	*	1.426	4.11763	-35.1171	150.661
SG	21	SG18	905	16	0	7240	0.007	0.51	*	1.761	3.55211	-35.1171	150.661
SG	21	SG19	1275	27	0	11475	0.015	0.71	*	1.384	0.947368	-35.117	150.661
SG	21	SG20	390	10	0	1950	0.001	0.21	*	1.267	2.69553	-35.117	150.661
SG	21	SG21	730	12	0	4380	0.02	0.32	*	0.987	3.16447	-35.1169	150.661
SG	21	SG22	670	21	0	4690	0.017	0.33	*	1.079	3.86684	-35.1169	150.661
SG	21	SG23	720	15	0	3600	0.037	0.3	*	1.712	2.96842	-35.1168	150.661
SG	21	SG24	480	14	9	3351	0.008	0.24	*	1.221	3.61526	-35.1168	150.661
SG	21	SG25	615	18	13.5	3676.5	0.011	0.29	*	1.129	3.41211	-35.1167	150.661
SG	21	SG26	425	15	0	2125	0.004	0.18	*	1.343	4.52263	-35.1169	150.661
SG	21	SG27	515	20	0	3555	0.011	0.27	*	0.684	3.88132	-35.1169	150.661
SG	21	SG28	570	15	0	4320	0.007	*	*	1.197	3.45763	-35.1169	150.661
SG	21	SG29	1715	22	0	12455	0.025	0.74	*	1.703	3.38632	-35.1169	150.661
SG	21	SG30	1175	22	0	8825	0.019	0.57	*	0.984	3.13842	-35.1169	150.661
ML	10	ML1	770	40	12	10738	0.633	0.76	1773.33	1.61	3.69132	-36.8973	149.909
ML	10	ML2	1265	36	85.5	15094.5	1.316	1.06	2650	1.783	1.12289	-36.8973	149.909
ML	10	ML3	785	38	49.5	9885.5	1.542	0.69	1610	2.055	1.94368	-36.8973	149.909
ML	10	ML4	1215	35	25.5	14304.5	1.278	0.78	2080	1.409	2.31263	-36.8973	149.909
ML	10	ML5	665	30	21	6629	0.203	0.54	1440	1.795	1.70684	-36.8973	149.909
ML	10	ML6	545	21	6	6024	1.636	0.45	1800	1.445	2.86816	-36.8974	149.909
ML	10	ML7	515	24	0	6180	0.299	0.43	1720	1.576	4.08526	-36.8974	149.909
ML	10	ML8	640	26	13.5	8306.5	0.468	0.51	1657.5	1.943	2.91789	-36.8974	149.909
ML	10	ML9	790	41	33	10952	0.956	0.74	1726.67	1.414	2.51342	-36.8974	149.909
ML	10	ML10	625	23	0	7315	1.548	0.45	1800	1.813	1.88026	-36.8974	149.909
ML	10	ML11	690	24	0	8280	0.481	0.57	*	1.81	3.42658	-36.8974	149.909
ML	10	ML12	710	37	33	9117	1.101	0.54	*	1.692	1.20684	-36.8975	149.909
ML	10	ML13	1165	50	63	14972	2.56	1.12	*	1.841	3.44526	-36.8975	149.909
ML	10	ML14	455	40	0	4925	0.545	0.29	*	1.235	0.153158	-36.8975	149.909
ML	10	ML15	305	31	16.5	3288.5	0.178	0.23	*	1.777	3.26053	-36.8976	149.908
ML	10	ML16	825	37	42	10613	0.502	0.63	*	1.521	1.93763	-36.8976	149.908
ML	10	ML17	720	45	24	8981	0.704	0.61	*	1.363	2.14868	-36.8976	149.908
ML	10	ML18	795	45	42	9363	1.54	0.63	*	1.722	2.86368	-36.8976	149.908
ML	10	ML19	575	34	24	6776	0.324	0.39	*	1.473	3.02158	-36.8976	149.908
ML	10	ML20	745	35	180	8620	0.701	0.53	*	1.397	2.26395	-36.8976	149.908
ML	10	ML21	530	18	18	4752	0.23	0.33	*	1.748	2.82158	-36.8977	149.908
ML	10	ML22	980	45	21	11634	0.737	0.73	*	1.713	3.50158	-36.8977	149.908
ML	10	ML23	740	31	34.5	8085.5	1.16	0.67	*	1.663	2.85474	-36.8977	149.908
ML	10	ML24	650	22	12	7138	0.445	0.45	*	2.101	3.86211	-36.8977	149.908
ML	10	ML25	460	22	7.5	5052.5	0.21	0.37	*	1.445	4.59658	-36.8976	149.908
ML	10	ML26	595	32	15	6500	0.213	0.41	*	1.748	2.85105	-36.8976	149.908
ML	10	ML27	505	24	42	6018	0.621	0.45	*	1.546	3.27158	-36.8976	149.908
ML	10	ML28	975	50	100.5	12384.5	1.386	0.98	*	1.626	1.975	-36.8976	149.908
ML	10	ML29	775	22	16.5	8508.5	1.028	0.55	*	1.46	2.86553	-36.8976	149.908
ML	10	ML30	980	25	58.5	12471.5	0.376	0.82	*	2.23	1.64421	-36.8975	149.908
PL	14	PL1	395	17	25.5	3414.5	0.029	0.27	877.5	1.373	5.35342	-36.9756	149.894
PL	14	PL2	370	23	18	2932	0.102	0.24	560	1.055	4.75474	-36.9756	149.894
PL	14	PL3	500	22	3	3727	0.101	0.33	843.7	0.987	2.20974	-36.9756	149.894
PL	14	PL4	460	22	49.5	3415.5	0.097	0.29	773.333	0.755	2.84053	-36.9756	149.894
PL	14	PL5	535	27	76.5	4883.5	0.203	0.4	1133.33	1.051	3.11711	-36.9756	149.894
PL	14	PL6	545	17	63	4642	0.168	0.34	1360	1.535	3.95026	-36.9755	149.894
PL	14	PL7	570	20	229.5	5470.5	0.118	0.42	1512	1.582	4.08711	-36.9755	149.894
PL	14	PL8	410	22	15	3025	0.099	0.28	560	1.351	3.92526	-36.9755	149.894
PL	14	PL9	565	18	48	5037	0.104	0.41	1742.5	1.439	2.57368	-36.9755	149.894
PL	14	PL10	645	27	16.5	5788.5	0.247	0.43	1146.67	0.692	2.09105	-36.9755	149.894
PL	14	PL11	590	32	43.5	4811.5	0.183	0.41	*	*	*	-36.9755	149.894
PL	14	PL12	420	27	114	3666	0.067	0.29	*	1.052	3.47895	-36.9755	149.894
PL	14	PL13	450	28	24	4186	0.146	0.32	*	1.119	4.13868	-36.9755	149.894
PL	14	PL14	485	27	31.5	4333.5	0.101	0.35	*	1.24	4.03105	-36.9755	149.894
PL	14	PL15	320	18	91.5	2788.5	0.053	0.22	*	1.285	4.95	-36.9755	149.894
PL	14	PL16	390	20	61.5	3838.5	0.081	0.34	*	1.286	5.14184	-36.9755	149.894
PL	14	PL17	420	18	60	3720	0.058	0.3	*	1.41	3.29421	-36.9757	149.893
PL	14	PL18	440	18	73.5	3886.5	0.12	0.35	*	0.97	2.59237	-36.9757	149.893
PL	14	PL19	315	18	52.5	2782.5	0.135	0.25	*	0.748	5.45053	-36.9758	149.893
PL	14	PL20	935	39	204	9071	0.35	0.66	*	1.222	2.68	-36.9758	149.893
PL	14	PL21	705	16	75	5565	0.104	0.46	*	1.518	2.29211	-36.9758	149.893
PL	14	PL22	315	24	94.5	2425.5	0.006	0.23	*	1.343	2.35605	-36.9758	149.893
PL	14	PL23	590	26	21	5259	0.056	0.41	*	1.443	2.51526	-36.9758	149.893
PL	14	PL24	805	30	3	8047	0.109	0.69	*	1.401	1.61737	-36.9758	149.893
PL	14	PL25	645	28	154.5	5970.5	0.13	0.49	*	1.146	2.12132	-36.9758	149.893
PL	14	PL26	635	29	108	6182	0.278	0.51	*	1.113	2.12474	-36.9758	149.893
PL	14	PL27	380	16	10.5	3029.5	0.08	0.28	*	1.035	4.59816	-36.9758	149.893
PL	14	PL28	585	27	13.5	5251.5	0.128	0.43	*	0.983	2.66868	-36.9758	149.893
PL	14	PL29	515	18	0	4635	0.104	0.37	*	1.284	2.76737	-36.9758	149.893
PL	14	PL30	395	16	85.5	3074.5	0.094	0.25	*	1.235	2.96079	-36.9758	149.893

## Sheet: Shoot density (quadrats)
Site	Sample	Shoot density
Wallis Lake	WL1	17
Wallis Lake	WL2	16
Wallis Lake	WL3	20
Wallis Lake	WL4	23
Wallis Lake	WL5	17
Wallis Lake	WL6	26
Wallis Lake	WL7	22
Wallis Lake	WL8	24
Wallis Lake	WL9	10
Wallis Lake	WL10	21
Port Stephens	PS1	14
Port Stephens	PS2	18
Port Stephens	PS3	15
Port Stephens	PS4	12
Port Stephens	PS5	12
Port Stephens	PS6	13
Port Stephens	PS7	19
Port Stephens	PS8	13
Port Stephens	PS9	19
Port Stephens	PS10	16
Lake Macqaurie	LM1	20
Lake Macqaurie	LM2	17
Lake Macqaurie	LM3	29
Lake Macqaurie	LM4	21
Lake Macqaurie	LM5	24
Lake Macqaurie	LM6	25
Lake Macqaurie	LM7	31
Lake Macqaurie	LM8	28
Lake Macqaurie	LM9	24
Lake Macqaurie	LM10	25
Brisbane Water	BW1	28
Brisbane Water	BW2	40
Brisbane Water	BW3	51
Brisbane Water	BW4	44
Brisbane Water	BW5	32
Brisbane Water	BW6	48
Brisbane Water	BW7	42
Brisbane Water	BW8	42
Brisbane Water	BW9	24
Brisbane Water	BW10	28
Pittwater	PW1	16
Pittwater	PW2	11
Pittwater	PW3	8
Pittwater	PW4	11
Pittwater	PW5	13
Pittwater	PW6	12
Pittwater	PW7	18
Pittwater	PW8	11
Pittwater	PW9	12
Pittwater	PW10	12
Sydney Harbour	SH1	17
Sydney Harbour	SH2	20
Sydney Harbour	SH3	16
Sydney Harbour	SH4	21
Sydney Harbour	SH5	12
Sydney Harbour	SH6	24
Sydney Harbour	SH7	24
Sydney Harbour	SH8	19
Sydney Harbour	SH9	36
Sydney Harbour	SH10	12
Botany Bay	BB1	16
Botany Bay	BB2	18
Botany Bay	BB3	12
Botany Bay	BB4	17
Botany Bay	BB5	9
Botany Bay	BB6	20
Botany Bay	BB7	8
Botany Bay	BB8	19
Botany Bay	BB9	17
Botany Bay	BB10	22
Port Hacking	PH1	20
Port Hacking	PH2	9
Port Hacking	PH3	8
Port Hacking	PH4	9
Port Hacking	PH5	10
Port Hacking	PH6	3
Port Hacking	PH7	13
Port Hacking	PH8	7
Port Hacking	PH9	7
Port Hacking	PH10	10
Jervis Bay	JB1	14
Jervis Bay	JB2	6
Jervis Bay	JB3	19
Jervis Bay	JB4	14
Jervis Bay	JB5	17
Jervis Bay	JB6	12
Jervis Bay	JB7	15
Jervis Bay	JB8	14
Jervis Bay	JB9	14
Jervis Bay	JB10	13
St Georges Basin	SG1	28
St Georges Basin	SG2	22
St Georges Basin	SG3	21
St Georges Basin	SG4	30
St Georges Basin	SG5	26
St Georges Basin	SG6	21
St Georges Basin	SG7	24
St Georges Basin	SG8	24
St Georges Basin	SG9	22
St Georges Basin	SG10	20
Merimbula Lake	ML1	8
Merimbula Lake	ML2	9
Merimbula Lake	ML3	9
Merimbula Lake	ML4	7
Merimbula Lake	ML5	11
Merimbula Lake	ML6	8
Merimbula Lake	ML7	10
Merimbula Lake	ML8	6
Merimbula Lake	ML9	6
Merimbula Lake	ML10	15
Pambula Lake	PL1	10
Pambula Lake	PL2	6
Pambula Lake	PL3	13
Pambula Lake	PL4	4
Pambula Lake	PL5	5
Pambula Lake	PL6	1
Pambula Lake	PL7	5
Pambula Lake	PL8	8
Pambula Lake	PL9	4
Pambula Lake	PL10	2

## Sheet: Fish data (nets + transects)
Site	Total herbivores	CPUE	Total species #	Total herb species #	Shannon diversity index		Carnivores	No	Herbivores/Omnivores		No
Wallis Lake	8	1.33333	5	3			Sandy sprat	211	Striped trumpeter		26
Port Stephens	16	2.66667	7	4			Surf sardine	1	Eastern talma		2
Lake Macquarie	4	0.666667	3	2			Mado	12	Bridled Goby		10
Brisbane Water	11	1.83333	9	5			Spotted pipefish	20	Silver drummer		7
Pittwater	2	0.333333	2	1			Krefft's Frillgoby	1	Eastern sea garfish		14
Sydney Harbour	7	1.16667	5	3			Catfish	1	Bridled Leatherjacket		11
Botany Bay	0	0	1	0			Porcupinefish	1	Luderick		4
Port Hacking	27	4.5	6	4			Rock flathead	1	Flat-tail mullet		9
Jervis Bay	0	0	1	0			Weedfish	30	Blenny		1
St Georges Basin	3	0.5	6	2			Small round silver	18	Garfish		5
Merimbula Lake	3	0.5	4	2					Six-spined leatherjacket		2
Pambula Lake	29	4.83333	9	5					Pygmy leatherjacket		1
	Wallis Lake	Port Stephens	Lake Macquarie	Brisbane Water	Pittwater	Sydney Harbour	Botany Bay	Port Hacking	Jervis Bay	St. Georges Basin	Merimbula Lake	Pambula Lake
Carnivores
Sandy sprat	4	27		99					1	56	1	23
Surf sardine	1
Mado		8		4
Spotted pipefish		1	1	2	2	1	2	3		5	1	2
Krefft's Frillgoby				1
Catfish						1
Porcupinefish								1
Rock flathead										1
Weedfish												30
Small round silver (?)										15		3
Herbivores/Omnivores
Striped trumpeter	3	1		6		1		4				11
Eastern talma	2
Bridled Goby	3	1	2	1								3
Silver drummer		1		2		2				2
Eastern sea garfish		13		1
Bridled Leatherjacket			2	1	2						2	4
Luderick						4
Flat-tail mullet								2		1		6
Blenny											1
Garfish												5
Six-spined leatherjacket								2
Pygmy leatherjacket								1

## Sheet: CV traits (meadow)
meadow	genotypes	Na	length	width	area	biomass	productivity	density	herbivory	epiphytes	nitrogen	phenols
WL	2	12	0.257422	0.227906	0.287412	0.283333	0.200329	0.239549	2.40849	0.696709	0.280952	0.32805
PS	5	12	0.191213	0.29733	0.24008	0.237576	0.305671	0.183236	1.23145	0.494335	0.176895	0.243572
LM	3	12	0.259206	0.222838	0.308491	0.328779	0.306774	0.175162	2.11658	1.06312	0.167069	0.2787
BW	4	14	0.223439	0.197387	0.26995	0.272525	0.261406	0.0988773	3.15584	0.770364	0.377974	0.326881
PW	3	10	0.266165	0.241337	0.323449	0.338374	0.392546	0.22555	2.18454	0.517586	0.178332	0.243039
SH	9	17	0.26622	0.227928	0.318448	0.391947	0.462176	0.349008	0.921592	0.501438	0.1565	0.466564
BB	7	11	0.244556	0.248031	0.303604	0.313703	0.386724	0.295057	0.939534	0.460579	0.135852	0.279444
PH	5	17	0.218587	0.136489	0.263199	0.276031	0.189743	0.466365	1.14853	0.746557	0.136993	0.23088
JB	3	13	0.189946	0.168812	0.239187	0.228665	0.3434	0.245855	0.84462	0.441339	0.229084	0.210956
SG	21	15	0.45396	0.282037	0.531629	0.40902	0.518355	0.138365	3.32182	2.54069	0.208479	0.336296
ML	10	15	0.309607	0.28059	0.350732	0.367227	0.181912	0.175162	1.11283	0.701627	0.139981	0.364403
PL	14	20	0.284302	0.24911	0.340945	0.31252	0.37989	0.628516	0.909407	0.593619	0.198324	0.333708
